# Supplementary material for: Absolute up-conversion quantum efficiency reaching 4% in β-NaYF4:Yb3+,Er3+ micro-cylinders achieved by Li+/Na+ ion-exchange
Source: Royal Society of Chemistry journal article supplement (doi:10.1039/c8tc01806e), 2018-01-01
Supplement: c8tc01806e1.pdf [file c8tc01806e1.pdf]

# **Absolute up-conversion quantum efficiency reaching 4% in $\beta$ -NaYF<sub>4</sub>:Yb<sup>3+</sup>,Er<sup>3+</sup> micro-cylinders achieved by Li<sup>+</sup>/Na<sup>+</sup> ion-exchange**

Shaohua Fan<sup>1, 2</sup>, Guojun Gao<sup>1, 3, \*</sup>, Shiyu Sun<sup>1</sup>, Sijun Fan<sup>1</sup>, Hongtao Sun<sup>4</sup>, Lili Hu<sup>1, \*</sup>

<sup>1</sup>Key Laboratory of Materials for High Power Laser, Shanghai Institute of Optics and Fine Mechanics, Chinese Academy of Sciences, Shanghai 201800, China

<sup>2</sup>University of Chinese Academy of Sciences, Beijing 100049, China

<sup>3</sup>Institute of Microstructure Technology, Karlsruhe Institute of Technology (KIT), Eggenstein-Leopoldshafen 76344, Germany

<sup>4</sup>College of Chemistry, Chemical Engineering and Materials Science, Soochow University, Suzhou 215123, China

\*Corresponding authors: G. Gao: guojun.gao@hotmail.com; L. Hu: hulili@siom.ac.cn

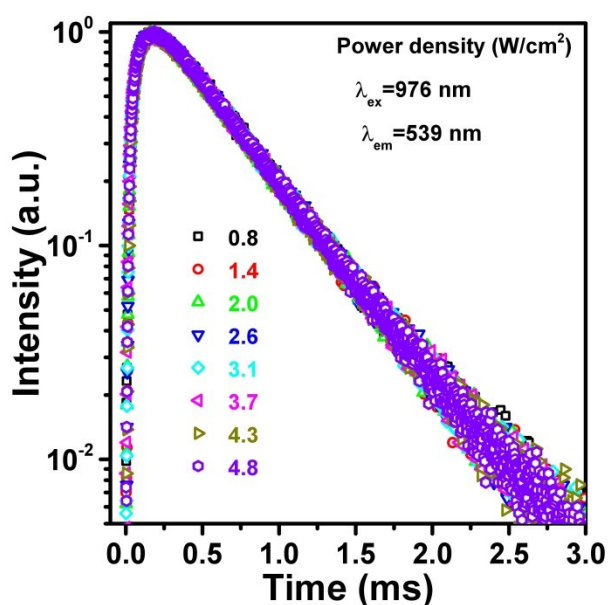

**Fig. S1.** The variation of decay curves of green UC emission for Li<sup>+</sup>/Na<sup>+</sup> IEM  $\beta$ -NaYF<sub>4</sub>:20%Yb<sup>3+</sup>,2%Er<sup>3+</sup> synthesized with LiF/NaF = 40/60 dependent on the pump power density (976 nm, 0.8 – 4.8 W/cm<sup>2</sup>).
